# Supplementary figures and images for: Silkworm Pupae Coupled with Glucose Control pH Mediates GABA Hyperproduction by Lactobacillus hilgardii
Source: MDPI journal article supplement (doi:10.3390/fermentation9070691), 2023-07-24

Supplemental material

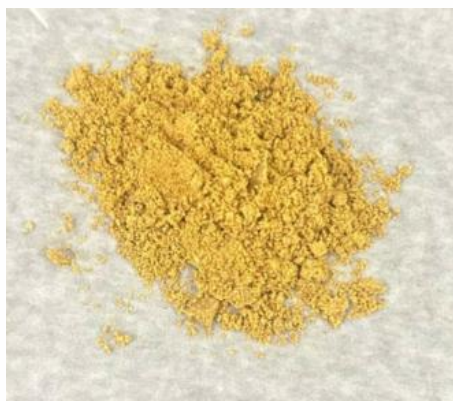

Figure S1 Picture of dried silkworm pupae meal

Supplement: s1 [file s1]
